# Supplementary material
Source: Springer Nature journal article supplement (https://www.springermedizin.de/resource/supplementary/12979_2008_58_MOESM3_ESM.pdf/9603270)

**A**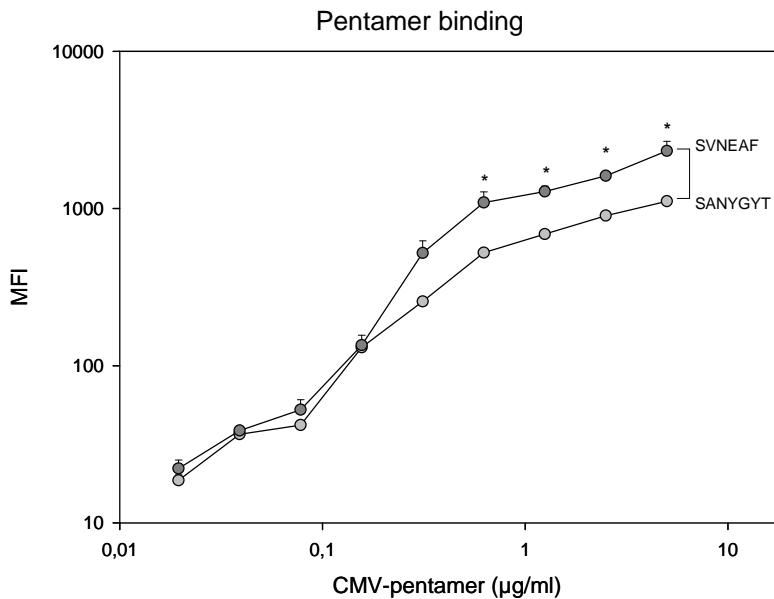**B**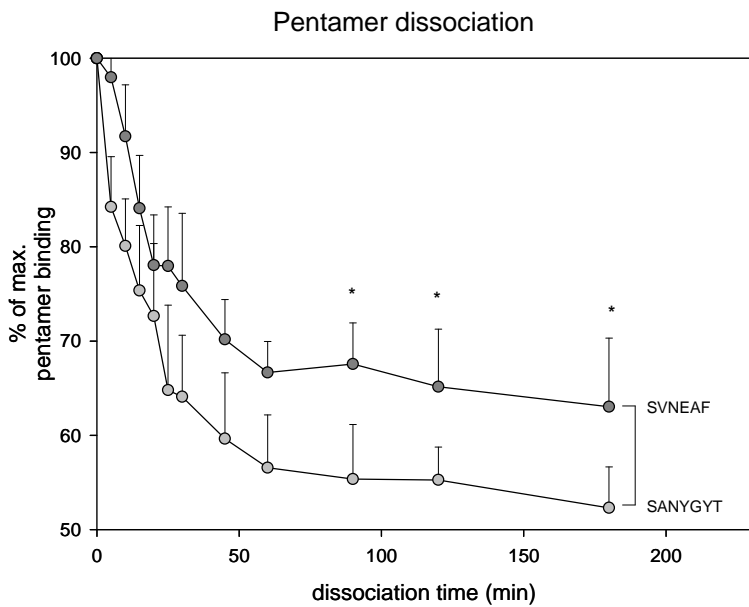

Supplement: MOESM3 [file 9603270]
